# Supplementary material
Source: Springer Nature journal article supplement (https://www.springermedizin.de/resource/supplementary/13002_2012_421_MOESM4_ESM.pdf/9626880)

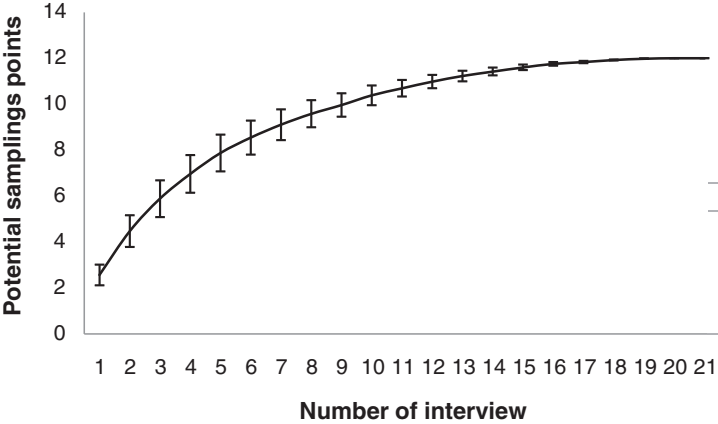

| Indications | N  |
|-------------|----|
| only 1      | 17 |
| 2 to 4      | 6  |
| 5 to 7      | 3  |
| > 7         | 3  |

Supplement: MOESM4 [file 9626880]
